# Supplementary material for: Facile synthesis of a MOF-derived Co–N–C nanostructure as a bi-functional oxygen electrocatalyst for rechargeable Zn–air batteries
Source: Royal Society of Chemistry journal article supplement (doi:10.1039/d3ra02191b), 2023-01-01

## Facile Synthesis of MOFs-derived Co-N-C nanostructure as Bi-functional Oxygen Electrocatalysts for Rechargeable Zn-air Batteries

Xinlei Luo<sup>a,1</sup>, Ziheng Zheng<sup>a,1</sup>, Bingxue Hou<sup>b</sup>, Xianpan Xie<sup>a</sup>, Cheng Cheng Wang<sup>a,\*</sup>

*<sup>a</sup>School of Entrepreneurship and Innovation, Shen Zhen Polytechnic, Shenzhen, 518055, China*

*<sup>b</sup>Aviation Engineering Institute, Civil Aviation Flight University of China, GuangHan, 618037, China*

*<sup>1</sup>The authors are making the same contribution to this paper.*

[\*] Corresponding Author:

[xxp@szpt.edu.cn](mailto:xxp@szpt.edu.cn)(X.P.Xie)

[wangchengcheng@szpt.edu.cn](mailto:wangchengcheng@szpt.edu.cn) (Dr.C.C. Wang)

Figure S1 N<sub>2</sub> adsorption isotherms of Co-N-C-900°C catalyst.

Figure S2 TEM images, EDS mapping as well as EDS spectra of selected Co-N-C-900 °C-acid catalysts.

**Figure S3.** Corresponding Koutecky-Levich (K-L) plots derived from LSV results on catalysts of Pt/C(a), Co-N-C-800°C(b), Co-N-C-900°C(c) and Co-N-C-900°C-acid(d) catalysts.

**Figure S4.** Half-wave potential for Pt/C, Co-N-C-800 °C, Co-N-C-900 °C and Co-N-C-900 °C-acid catalysts (a); Exchange current density obtained at 0.75 V of Pt/C, Co-N-C-800°C, Co-N-C-900°C and Co-N-C-900°C-acid catalysts (b) of these catalysts under O<sub>2</sub> 0.1 M KOH with 1600 rpm rotation rate with 10 mV/s scan rate.

Figure S5. Chronopotentiometry results of Co-N-C-900°C measured at 10 mA/cm<sup>2</sup> in 0.1 M KOH at 1600 rpm rotation rate.

Figure S6. Surface morphology of Co-N-C-900°C coated on the carbon foam assembled Zn-air battery after long term stability test. (Big round particles referred to Zn)

Real-time video was attached in the file.

Fig.S1

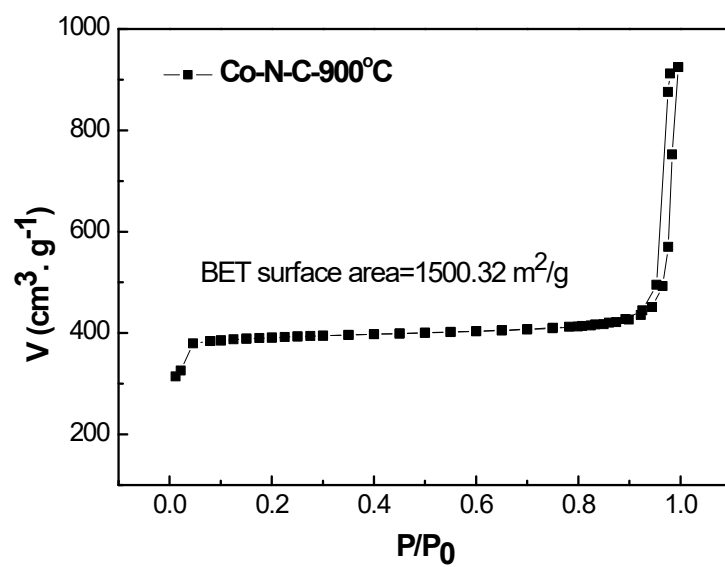

Figure S2.

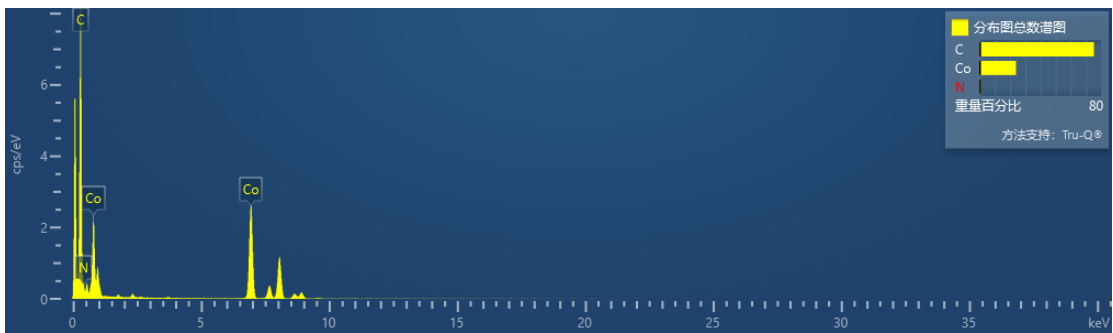

**Figure S3.**

**Figure S4.**

Figure S5.

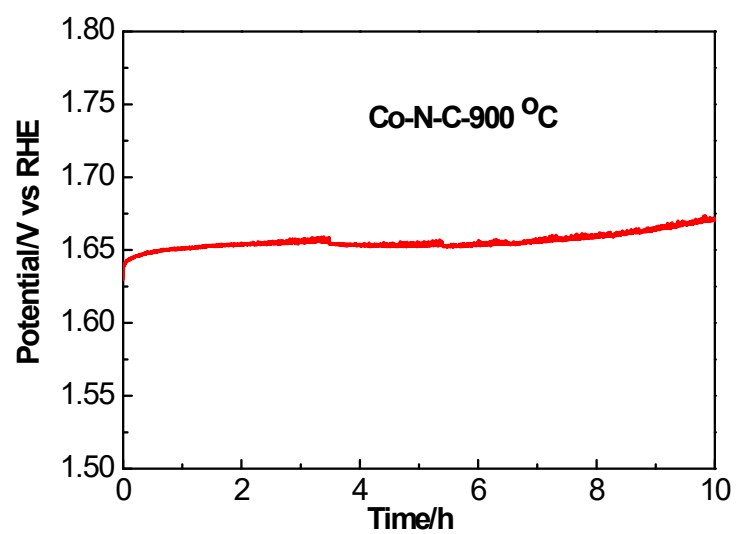

Figure S6.

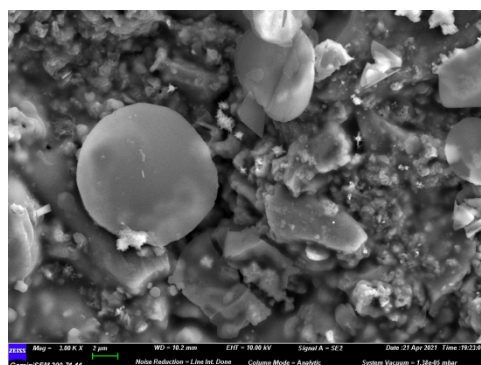

Supplement: d3ra02191b1.pdf [file d3ra02191b1.pdf]
